# Supplementary material
Source: PubMed Central journal article supplement (PMC2533086)
Supplement: M804770200_1.pdf [file M804770200_1.pdf]

## PROTEIN KINASE R-DEPENDENT REGULATION OF INTERLEUKIN-10 IN RESPONSE TO DOUBLE-STRANDED RNA\*

Arindam Chakrabarti<sup>‡1</sup>, Anthony J. Sadler<sup>§1</sup>, Niladri Kar<sup>‡¶1</sup>, Howard A. Young<sup>¶</sup>, Robert H. Silverman<sup>‡</sup>, and Bryan R. G. Williams<sup>§2</sup>

From the Departments of <sup>‡</sup>Cancer Biology and <sup>¶</sup>Molecular Cardiology, Lerner Research Institute, The Cleveland Clinic, Cleveland, Ohio 44195, <sup>§</sup>Monash Institute of Medical Research, Monash University, Clayton, Victoria 3168, Australia, and <sup>¶</sup>Laboratory of Experimental Immunology, National Cancer Institute-Frederick, Frederick, Maryland 21702

Running head: PKR-dependent regulation of IL-10

<sup>1</sup>Both authors contributed equally to this work.

<sup>2</sup>To whom correspondence should be addressed: Monash Institute of Medical Research, Monash Medical Centre, 246 Clayton Rd, Clayton, Victoria 3168, Australia. Tel.: 61-3-9594-7166; Fax: 61-3-9594-7167; E-mail: bryan.williams@med.monash.edu.au

### SUPPLEMENTAL FIGURE LEGENDS

**FIGURE S1. Optimal concentrations of the chemical inhibitors.** *A*, wt SM cells were treated with indicated doses of SB203580 (SB), PD98059 (PD), SP600125 (SP), or as a control the solvent DMSO (D) for 1 h, or left untreated (C) prior to the treatment with pIC (50 µg/ml) for 30 min. Cell lysates were used to measure phospho-MAPKAPK2, phospho-Erk1/2 and phospho-JNK levels by Western blot. *B*, wt SM were treated with indicated doses of BAY-11, or as a control the solvent DMSO (D) for 1 h, prior to the treatment with pIC (50 µg/ml) for 30 min, or left untreated (D). Total RNA was isolated and the levels of IL-10 mRNA quantitated by PCR.

**FIGURE S2. Appearance of wt and pkr-ko SM cells.** *A*, Phase-contrast microscopic images of wt and pkr-ko SM cells compared to the murine macrophage cell line *RAW264.7*. *B*, Western blot showing protein bands detected in lysates from the wt or pkr-ko SM cells using the anti-PKR polyclonal antibody D-20 (Santa Cruz Biotechnology).

**FIGURE S3. IL-10 induction is impaired in wt SM cells treated with an inhibitor or an RNAi targeting PKR.** *A*, To further confirm the PKR dependence of the different induction of IL-10 demonstrated in cell lines wild-type or ablated for PKR, SM cells were left untreated (NT) or treated with the PKR inhibitor 2-aminopurine (2AP, 10 µM) for 1 h prior to stimulation with LPS (10 ng/ml) for 6 h. *B*, RNAi constructs targeting LacZ, as a nonspecific control, or PKR were transiently transfected into wt SM 36 h prior to stimulation with LPS (10 ng/ml) for 6 h. Total RNA was isolated and the levels of the IL-10 transcript were measured by real-time PCR. *C*, Phase-contrast and fluorescent microscope images of wt SM cells transiently transfected with constructs expressing the control, LacZ or PKR targeting RNAs. As the silencing RNA are inserted into the 3' UTR region of a GFP reporter gene, appropriate expression of the interfering RNA is confirmed by fluorescence in cells.

**FIGURE S4. Sequence comparison between the murine and human IL-10 promoter sequences.**

Genomic sequence alignment produced by Ensembl ([www.ensembl.org](http://www.ensembl.org)) for *Homo sapiens* IL-10 (ENSG00000136634) and *Mus musculus* IL-10 (ENSMUSG00000016529). Nucleotides mutated in the distal (-861/-851) and proximal (-59/-39) NF-κB binding sites are underlined.

# Supplemental Figure 1

A

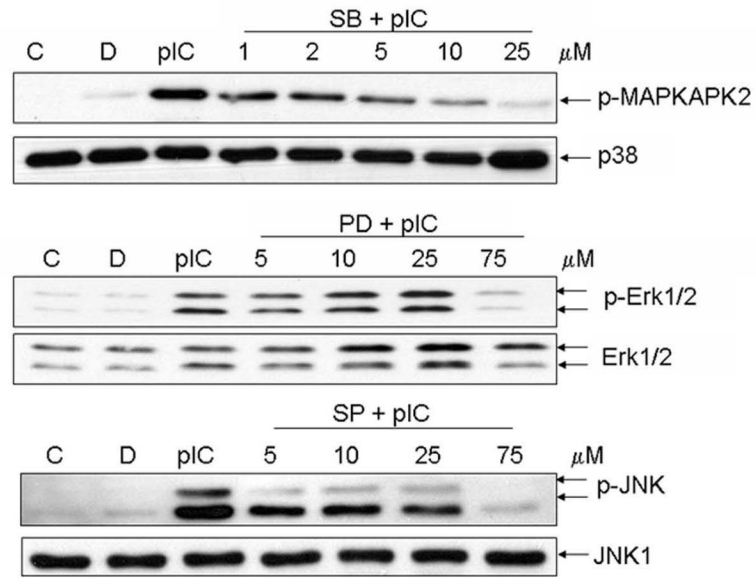

B

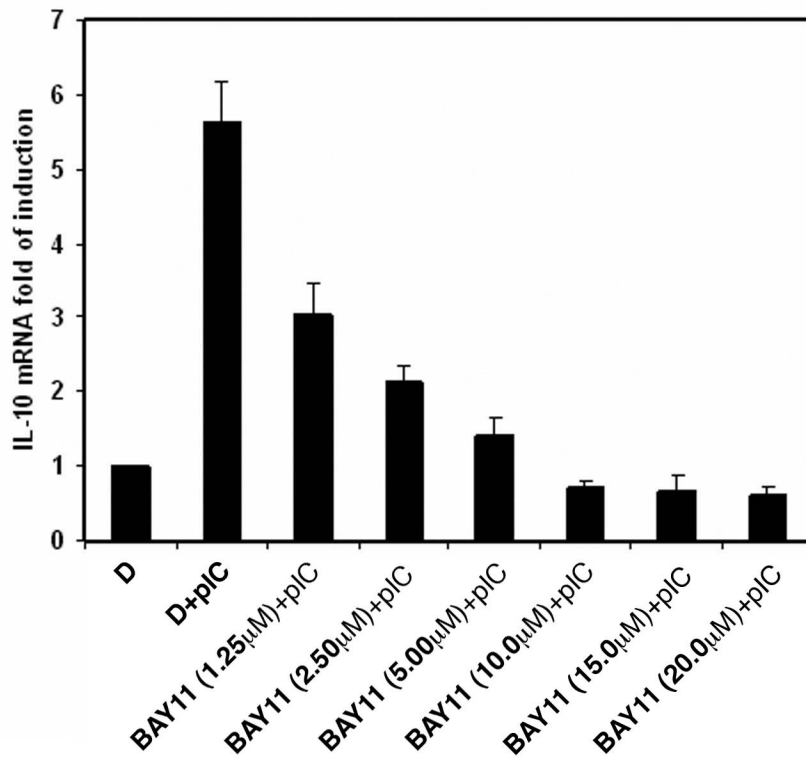

# Supplemental Figure 2

A

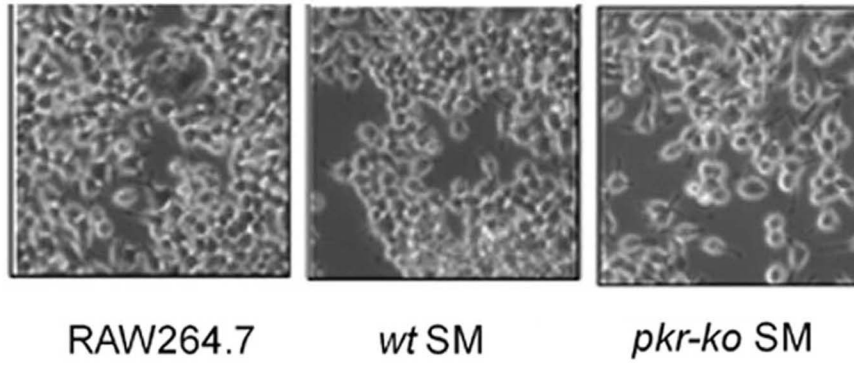

B

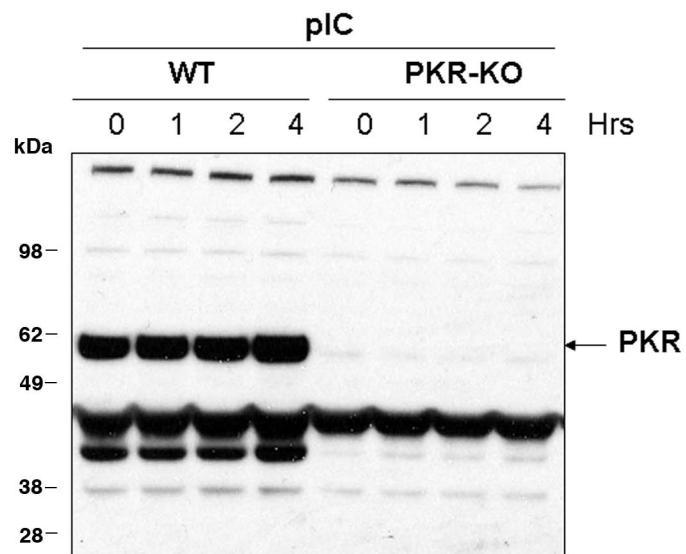

### Supplemental Figure 3

A

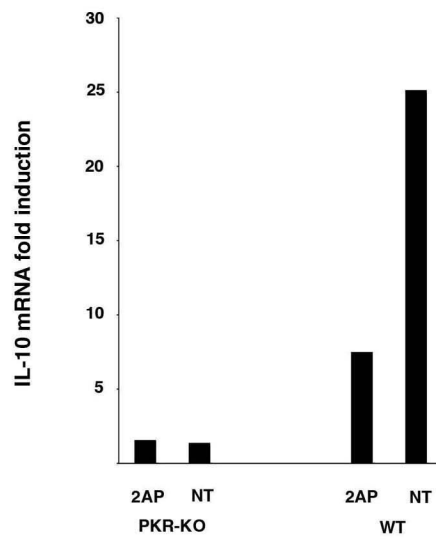

B

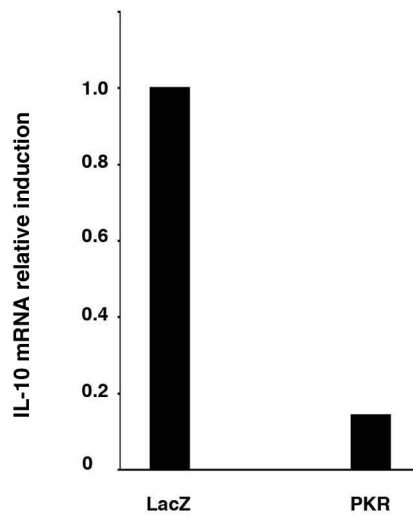

C

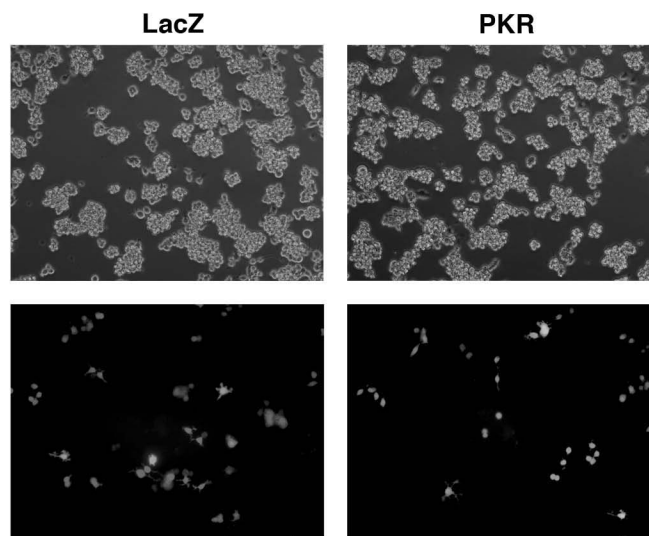

### Supplemental Figure 4

Homo\_sapiens CCTCCATCTGGGTCCATGGCTACTTAAGCTCAATGCTCCCTGGCAGGCAGGAGACAGGTGCTATTGCCCTGTTGGGACAGATGAAAAACAGACACAGGGAGGATGAGTGATTTGCCCTG  
Mus\_musculus CCTCTACATGGGTCTACTTTTATTTAAGC-AAACATTCCCTGGT---CAACAGGACGTGTAGCATTGCCCCCTTGGGTACACAGAAAACAGGTACCAGGAGGACAAGTAGTTTGCCCG

Homo\_sapiens ACTATAGAGTGGCAGGGCCAAGGCAGAGCCCAGGCCCTCTGCACCTAGGTCACTGTTCCCTCCAGTTACAGTCTAAACTGGAATGGCAGGCAAAGCCCTGTGGAAGGGGAAGGTGAAGG  
Mus\_musculus GGTACAGAATGAAAGGCAATAGG-----GGACT-----CTAGGCGAATGTTCTTCCCA-----CCCAAAGTGGGTAGTAGGAGAAGTCCCTACTGAA-GGGAAGGTCCAGA

Homo\_sapiens CTCAATCAAAGGATCCCCAGAGACTTTCAGATATCTGAAGAAGTCTGTACTGCCCCGGTCTTCCCCAGGTAGAGCAACACTCCTCGCCGCAACCCAAGTGGCTCCCCTTACCT  
Mus\_musculus CATAATCAAAGGACTACCAGAGATCTCCAGGTATCTGTAGAAGTACTAACATCTCC-----ATCCTTCAACAGCTACAG.....

Homo\_sapiens TCTACACACACACACACACACACACACACACACACACACACACACAAATCCAAGACAACACTACTAAGGCTTCTTTGGGAAGGGGAAGTAGGGATAGGTAAGAGGAAAGTAAGGGACC  
Mus\_musculus .....

Homo\_sapiens TCCTATCCAGCCTCCATGGAATCCTGACTTCTTTTCTTGTATTTCACACTTCTTCCACCCATCTTTTAAACTTTAGACTCCAGCCACAGAAGCTTACAATAAAAGAACTCTAAGGC  
Mus\_musculus .....

Homo\_sapiens CAATTTAATCCAAGGTTTCATTCTATGTGCTGGAGATGGTGTACAGTAGGGTGAGGAAACCAAATCTCAGTTGGCACTGGTGTACCCTTGTACAGGTGATGTAATATCTCTGTGCCTCA  
Mus\_musculus .....

Homo\_sapiens GTTTGCTCACTATAAAATAGAGACGGTAGGGTCTGTTGAGCACTACCTGACTAGCATATAAGAAGCTTTCAGCAAGTGCAGACTACTCTTACCCACTTCCCCAAGCACAGTTGGGGT  
Mus\_musculus .....CATTGTAAACAG-----GGCCATGGTAAGGTCTACCCGAC-AGCACAGAGCAAGCCTCCAGAAGTCTGAGTTCCTTCTCCTAACTTCTCAT-----GCTGGGAT

Homo\_sapiens GGGGGACAGCTGAAGAGGTGGAACATGTGCCTGAGAATCCTAATGAAATCGGGGTAAAGGAGCCTGGAACACATCCTGTGACCCCGCCTGTACTGTAGGAAGCCAGTCTCTGGAAGTA  
Mus\_musculus -----CTGAGCTTCTCGTGAAACCGGGGACAGGAGACCAGAATC-TCCTCTGACCCGCCCATATCCTCAAAGGATAGTCTT--GAATACG

Homo\_sapiens AAATGGAAGGGCTGCTTGGGAACCTTGAGGATATTTAGCCCACCCCTCATTTTTACTTGGGGAACTAAGGCCACAGACCTAAGGTGACTGCCTAAGTTAGCAAGGAGAAGTCTTGGG  
Mus\_musculus TGATGGAAGAATTGAGAGTGAGGTCTGAAGAAAATCAGCCCTCTCG---GGGTTTCTTTGGGTAAGT-----GAGTGCTAAGGTGACTTCC-GAGTCAGCAAG---AAATATCGGA

Homo\_sapiens TATTCATCCCAGGTTGGGGGACCCAATTATTCTCAATCCATTGTATTCTGGAATGGGCAATTTGTCCACGTCACTGTGACCTAGGAACACGGAATGAGAACCACAGCTGAGGGCC  
Mus\_musculus CGTTCAACCCAGGTTGGGAGGAAACAATTATTCTCAATCCTAATATGTTCTGGAATAGCCATTTATCCACGTCAATATGACCTGGGAGTGCGTGAATG-GAATCCACAGATGAGGGCC

Homo\_sapiens TCTGCGCACAGAACAGCTGTCTCCCAGGAAATCAACTTTTTTAAATGAGAAGCTAAAAAATTATTCTAAGAGAGGTAGCCCATCCTAAAAATAGCTGTAATGCAGAAGTTCATGTTT  
Mus\_musculus TCTGTACATAGAACAGCTGTCTGCCCTCAGGAAATCAACTTTTAGTA-TTGAGAAGCTAAAAAATAAAAGAGAGGTAGCCATACTAAAAATAGCTGTAATGCAGAAGTTCAT-TCC

Homo\_sapiens AACCAATCATTTTTGCTTACGATGCAAAAATGAAAATAAGTTTATTAGAGAGGTAGAGAAGGAGGAGCTTAAGCAGAAAAATCCTGTGCCGGGAAACCTTGATTGTGGCTTTTTTA  
Mus\_musculus GACCAGTTCTTTGCGCTTACAATGCAAAAAAAGAAATTAAGTCAATGTCATGTTTAGAGGAGGAGGAGCCTGAATAACAAAA--CCTTTGCCAGGAA-----

Homo\_sapiens ATGAATGAAGAGGCCCTCCCTGAGCTTACAATATAAAAGGGGACAGAGAGGTGAAGGTCTACACATCAGGGGCTTGCTCTTGCAAAACCAAACCACAAGACAGACTTGCAAAAGAAGGC  
Mus\_musculus -----GGCCCACTGAGCCTTCAGTATAAAAGGGGACCAAGAACAGGAGGTCTACAT-TTAGAGACTTGCTCTTGCACTACCAAACCACAAGGACGCTTGCAAAAAGAGC
